# Supplementary material for: Sensitive detection of intracellular telomerase activity via double signal amplification and ratiometric fluorescence resonance energy transfer
Source: Royal Society of Chemistry journal article supplement (doi:10.1039/d0an01291b), 2020-01-01
Supplement: d0an01291b1.pdf [file d0an01291b1.pdf]

## Supporting Information

### Sensitive Detection of Intracellular Telomerase Activity via Double Signal Amplification and Ratiometric Fluorescence Resonance Energy Transfer

Bei Zhang, Lu Shi, Wei Liu, Baoxin Li, and Yan Jin \*

Key Laboratory of Analytical Chemistry for Life Science of Shaanxi Province, Key  
Laboratory of Applied Surface and Colloid Chemistry, Ministry of Education, School of  
Chemistry and Chemical Engineering, Shaanxi Normal University, Xi'an 710119, China

\* Corresponding author: Prof. Yan Jin, Email: [jinyan@snnu.edu.cn](mailto:jinyan@snnu.edu.cn).

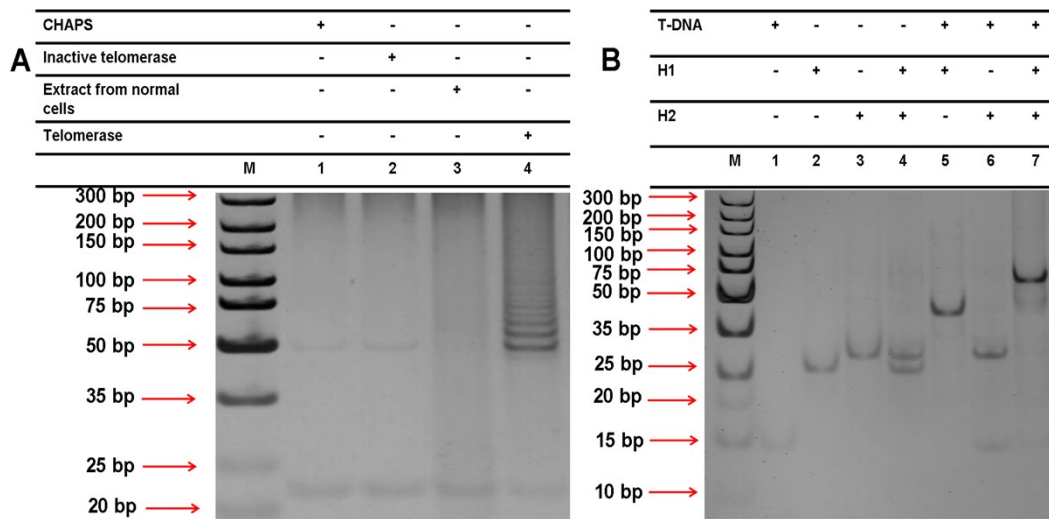

Figure S1. (A) Analysis of telomerase activity by TRAP assay, (B) Gel electrophoresis of SDR reaction.

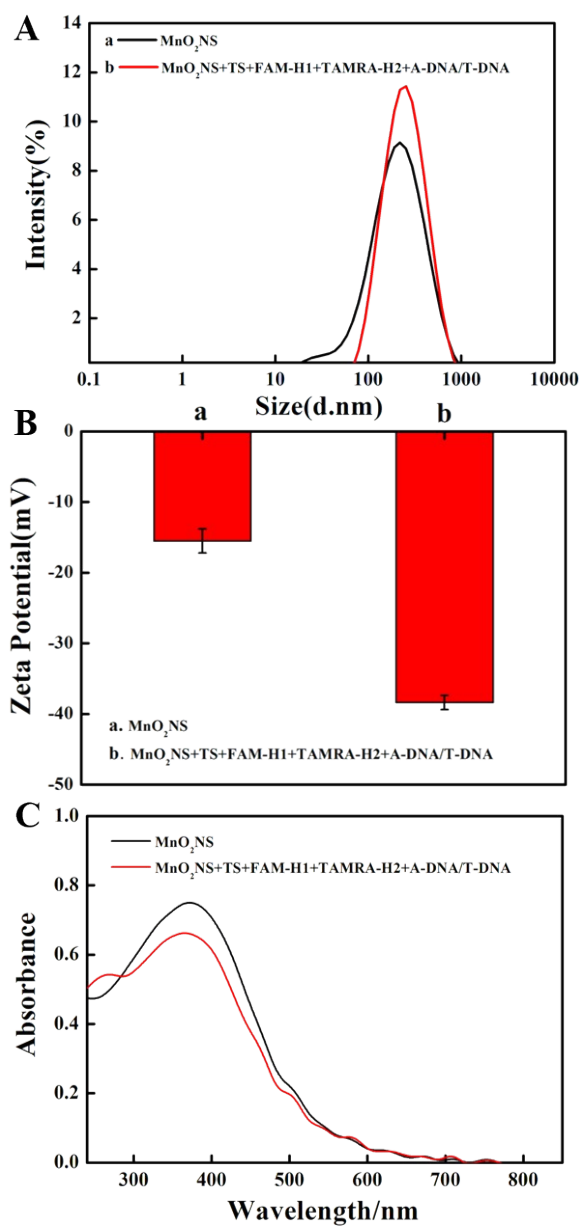

Figure S2. (A) DLS results of  $\text{MnO}_2\text{NS}$  and  $\text{MnO}_2\text{NS/DNAs}$ . (B) Zeta potential of  $\text{MnO}_2\text{NS}$  and  $\text{MnO}_2\text{NS/DNAs}$ . (C) UV-vis absorption spectra of  $\text{MnO}_2\text{NS}$  and  $\text{MnO}_2\text{NS/DNAs}$ .

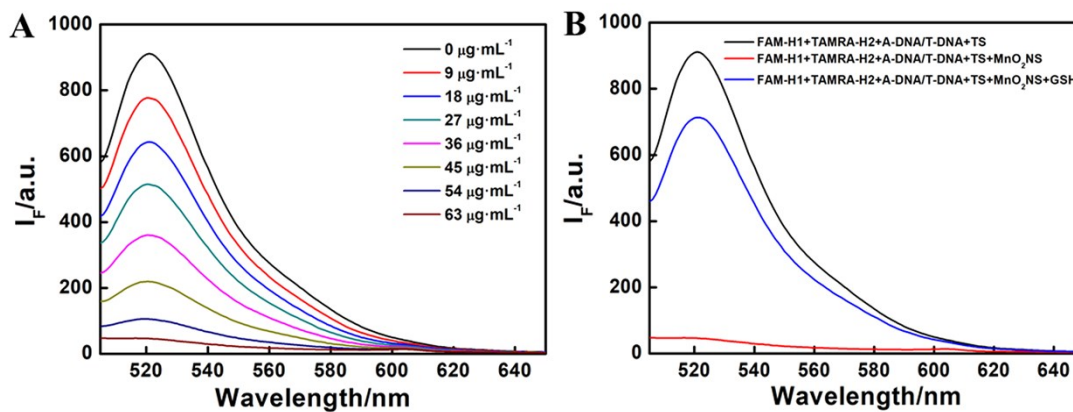

Figure S3. (A) Fluorescence quenching of FAM-H1 by  $MnO_2NS$ . The concentrations of  $MnO_2NS$  increased from 0 to 63  $\mu g \cdot mL^{-1}$ . The concentration of FAM-H1, TAMRA-H2, A-DNA/T-DNA and TS were 100 nM, 100 nM, 50 nM, 20 nM respectively. (B) Fluorescence recovery induced by 2 mM GSH.

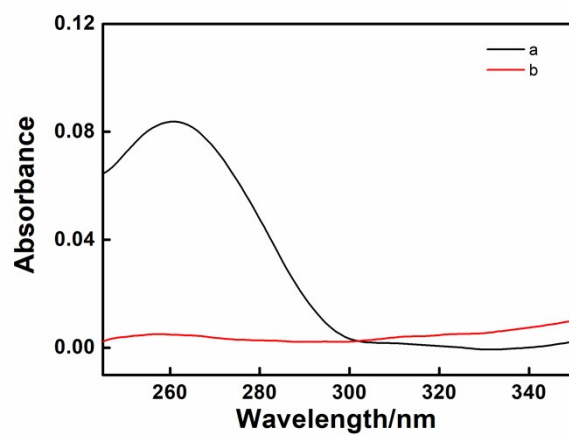

Figure S4. Adsorption analysis of DNA loading efficiency on  $\text{MnO}_2\text{NS}$ . (a) the UV-vis absorption spectrum of FAM-H1, TAMRA-H2, A-DNA/T-DNA and TS; (b) the UV-vis absorption spectrum of supernate after the centrifugation of the DNA/ $\text{MnO}_2\text{NS}$  mixture.

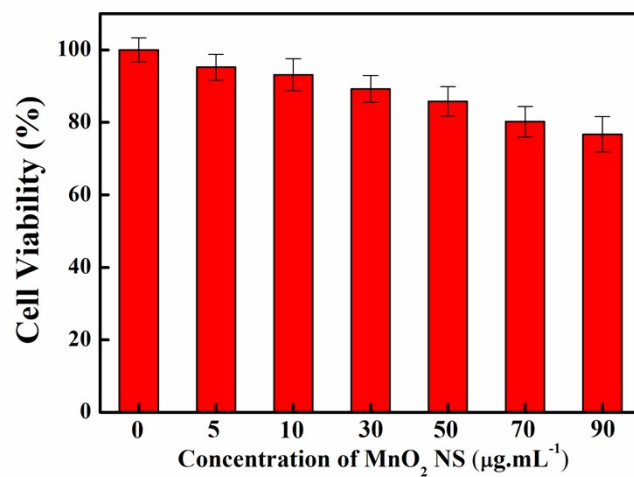

Figure S5. Cytotoxicity assay of MnO<sub>2</sub>NS with different concentrations to HeLa cells.

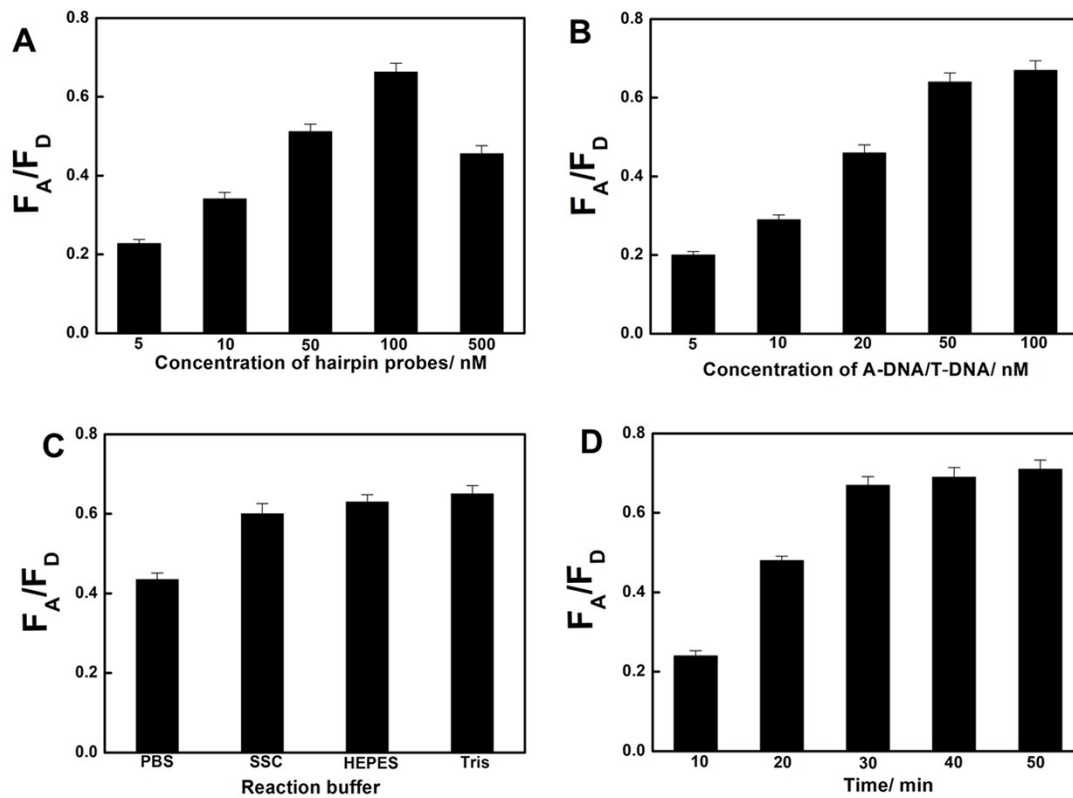

Figure S6. (A) Effect of the concentration of FAM-H1 and TAMRA-H2 on the FRET ratio, (B) Effect of the concentration of A-DNA/T-DNA on the FRET ratio, (C) Effect of the different kinds of buffer on the FRET ratio, (D) Effect of the reaction time for SDR on the FRET ratio.

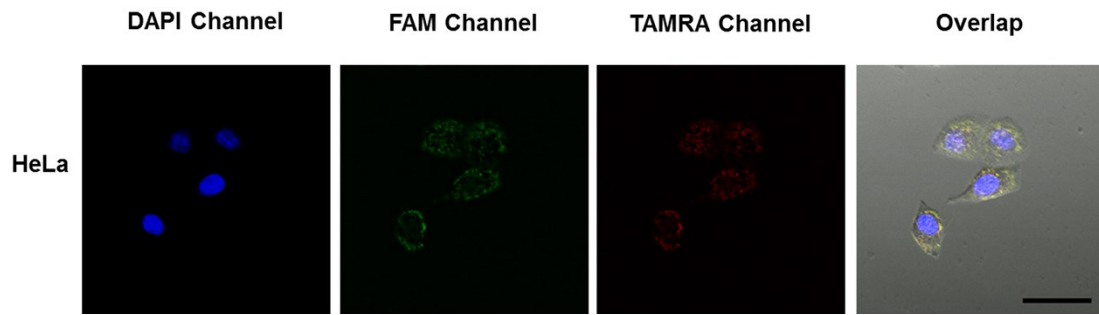

Figure S7. Counterstaining assay for locating the distribution of telomerase in HeLa cells. The nuclear dye is DAPI.



Table S1. Sequences of the oligonucleotides used in the experiment.

| Name     | Sequence                                                                    |
|----------|-----------------------------------------------------------------------------|
| FAM-H1   | FAM-5'-<br>AAAATTAGGGTCTACCTTCAACACACAAGGTAGA<br>CCCTAACCCCTAACT-3'         |
| TAMRA-H2 | 5'-<br>ACCTTCAACACACAAGGAGTTAGGGTCTACCTTG<br>TGTGTTGAAGGTAGACCCTAA-3'-TAMRA |
| A-DNA    | 5'-<br>CCTAACCCCTAACCCCTAACCCCTAACTCTGCTCCTAT<br>-3'                        |
| T-DNA    | 5'-AGTTAGGGTTAGGGTCTACCTT-3'                                                |
| TS       | 5'-AATCCGTCGAGCAGAGTT-3'                                                    |
| ACX      | 5'-GCGCGGCTTACCCTTACCCTTACCCTAACCC-3'                                       |

Table S2. Comparison of the analytical performance for telomerase activity detection.

| Analytical Method                 | Linear range                             | Detection limit | Refs                  |
|-----------------------------------|------------------------------------------|-----------------|-----------------------|
| Fluorometric assay                | 2000–40000 HeLa cells                    | 220 HeLa cells  | (Hong et al., 2016)   |
| Fluorometric assay                | 200–100000 HeLa cells                    | 200 HeLa cells  | (Tian et al., 2013)   |
| Fluorometric assay                | 500–10000 HeLa cells                     | 185 HeLa cells  | (Zhu et al., 2015)    |
| Fluorometric assay                | 50–2000 HeLa cells                       | 30 HeLa cells   | (Zhu et al., 2018)    |
| Fluorometric assay                | 50–1000 HeLa cells                       | 33 HeLa cells   | (Yang et al., 2017)   |
| Chemiluminescence                 | 100–1000 HeLa cells                      | 100 HeLa cells  | (Li et al., 2011)     |
| Chemiluminescence                 | -                                        | 500 HeLa cells  | (Xiao et al., 2004)   |
| Colorimetry                       | $5 \times 10^3$ – $10^6$ cells/mL        | 100 HeLa cells  | (Feng et al., 2019)   |
| Colorimetry                       | 500–1000 HeLa cells                      | 25 HeLa cells   | (Yu et al., 2018)     |
| Electrochemical assay             | $50$ – $50 \times 10^5$ cells/mL         | 20 HeLa cells   | (Ling et al., 2020)   |
| Electrochemical assay             | $300$ – $1.04 \times 10^7$ HeLa cells/mL | 8.20 HeLa cells | (Wang et al., 2020)   |
| Electrochemiluminescence          | $100$ – $9 \times 10^3$ HeLa cells       | 62 HeLa cells   | (Zhang et al., 2014a) |
| Electrochemiluminescence          | $313$ – $1 \times 10^4$ HeLa cells       | 148 HeLa cells  | (Zhang et al., 2014b) |
| Surface-Enhanced Raman Scattering | 1-1000 HeLa cells                        | 10 HeLa cells   | (Li et al., 2019)     |
| This work                         | 20–1000 HeLa cells                       | 20 HeLa cells   | -                     |

## References

- Hong, M., Xu, L. D., Xue, Q. W., Li, L., Tang, B., 2016, *Anal. Chem.* 88, 12177-12182.
- Li, Y., Li, X., Ji, X., Li, X., 2011, *Biosens. Bioelectron.* 26, 4095-4098.
- Tian, T., Peng, S., Xiao, H., Zhang, X. E., Guo, S., Wang, S. R., Zhou, X., Liu, S. M., Zhou, X., 2013, *Chem. Commun.* 49, 2652-2654.
- Xiao, Y., Pavlov, V., Niazov, T., Dishon, A., Kotler, M., Willner, I., 2004, *J. Am. Chem. Soc.* 126, 7430-7431.
- Yang, H. T., Liu, A. R., Wei, M., Liu, Y. J., Lv, B. J., Wei, W. Y., Zhang, J., Liu, S. Q., 2017, *Anal. Chem.* 89, 12094-12100.
- Zhu, G., Yang, K., Zhang, C. Y., 2015, *Chem. Commun.* 51, 6808-6811.
- Zhu, X. L., Ye, H. Y., Liu, J. W., Yu, R. Q., Jiang, J. H., 2018, *Anal. Chem.* 90, 13188-13192.
- Feng, E. D.; Zheng T. T.; Tian Y., 2019. *ACS Sens.* 4, 211-217.
- Yu, T.; Zhao, W.; Xu, J. J.; Chen, H. Y., 2018. *Talanta* 178, 594-599.
- Ling, P. H.; Qian, C. H.; Yu, J. J.; Gao, F., 2020. *Biosens. Bioelectron.* 149, 111838.
- Wang, L.; Meng, T. j.; Zhao, D.; Jia, H. X.; An, S. y.; Yang, X. j.; Wang, H.; Zhang, Y. F. 2020, *Biosens. Bioelectron.* 148, 111834.
- Zhang, H.-R., Wang, Y.-Z., Wu, M.-S., Feng, Q.-M., Shi, H.-W., Chen, H.-Y., Xu, J.-J., 2014. *Chem. Commun.* 50, 12575–12577.
- Zhang, H.-R., Wu, M.-S., Xu, J.-J., Chen, H.-Y., 2014. *Anal. Chem.* 86, 3834–3840.

Li, Y.; Han, H. X.; Wu, Y. D.; Yu, C. F.; Ren, C. N.; Zhang, X. R., 2019. Biosens.

Bioelectron. 142, 111543
